# Supplementary material for: Development of a Long-Term Sampling Method for Determination of NMHCs in Indoor Air
Source: MDPI journal article supplement (doi:10.3390/molecules28135001), 2023-06-26

Supplementary Material for:

## Development of a Long-Term Sampling Method for Determination of NMHCs in Indoor Air

Darya Urupina <sup>1,\*</sup>, Sylvie Traverse <sup>2</sup>, Thierry Leonardis <sup>1</sup>, Elise Eymard-Vernain <sup>3</sup>, Julien Guilhermet <sup>3</sup>, Vincent Ricard <sup>3</sup>, Marie Lemoine <sup>2</sup>, Camille Varlet <sup>1</sup>, Remy Gillet <sup>2</sup> and Nadine Locoge <sup>1</sup>

<sup>1</sup> IMT Nord Europe, Institut Mines-Telecom, Centre for Energy and Environment, University Lille, 59000 Lille, France; thierry.leonardis@imt-nord-europe.fr (T.L.); camille.varlet@imt-nord-europe.fr (C.V.); nadine.locoge@imt-nord-europe.fr (N.L.)

<sup>2</sup> GINGER-BURGEAP, 19 Rue de la Villette, CEDEX 3, 69425 Lyon, France; s.traverse@groupeginger.com (S.T.); m.lemoine@groupeginger.com (M.L.); r.gillet@groupeginger.com (R.G.)

<sup>3</sup> TERA Environment, 628 Rue Charles de Gaulle, 38920 Crolles, France; elise.eymardvernain@tera-environnement.com (E.E.-V.); julien.guilhermet@tera-environnement.com (J.G.); vincent.ricard@tera-environnement.com (V.R.)

\* Correspondence: darya.urupina@imt-nord-europe.fr

## Tables

Table S1: Select NMHCs sampling rates for RAD 145 sampling device when sampled for 1 week at 25 °C.

| analyte            | Sampling rates (ml.min <sup>-1</sup> ) | Exposure time upper limit (days) |
|--------------------|----------------------------------------|----------------------------------|
| hexane             | 25.5                                   | 7                                |
| benzene            | 27.8                                   | 7                                |
| heptane            | 25.3                                   | 14                               |
| toluene            | 30.0                                   | 14                               |
| octane             | 24.1                                   | 14                               |
| ethylbenzene       | 25.7                                   | 14                               |
| meta + para-xylene | 26.6                                   | 14                               |
| o-xylene           | 24.6                                   | 14                               |
| decane             | 22.3                                   | 14                               |
| naphthalene        | 20*                                    | -                                |

\* The value is not provided by Radiello guide and is calculated by Maugeri foundation.

## Figures

Figure S1: Stability of generated concentrations of NMHCs in breakthrough studies. In most cases each point represents an average of 24 measurements. Sometimes an average of 5 to 23 measurements is taken depending on availability of analytical data.

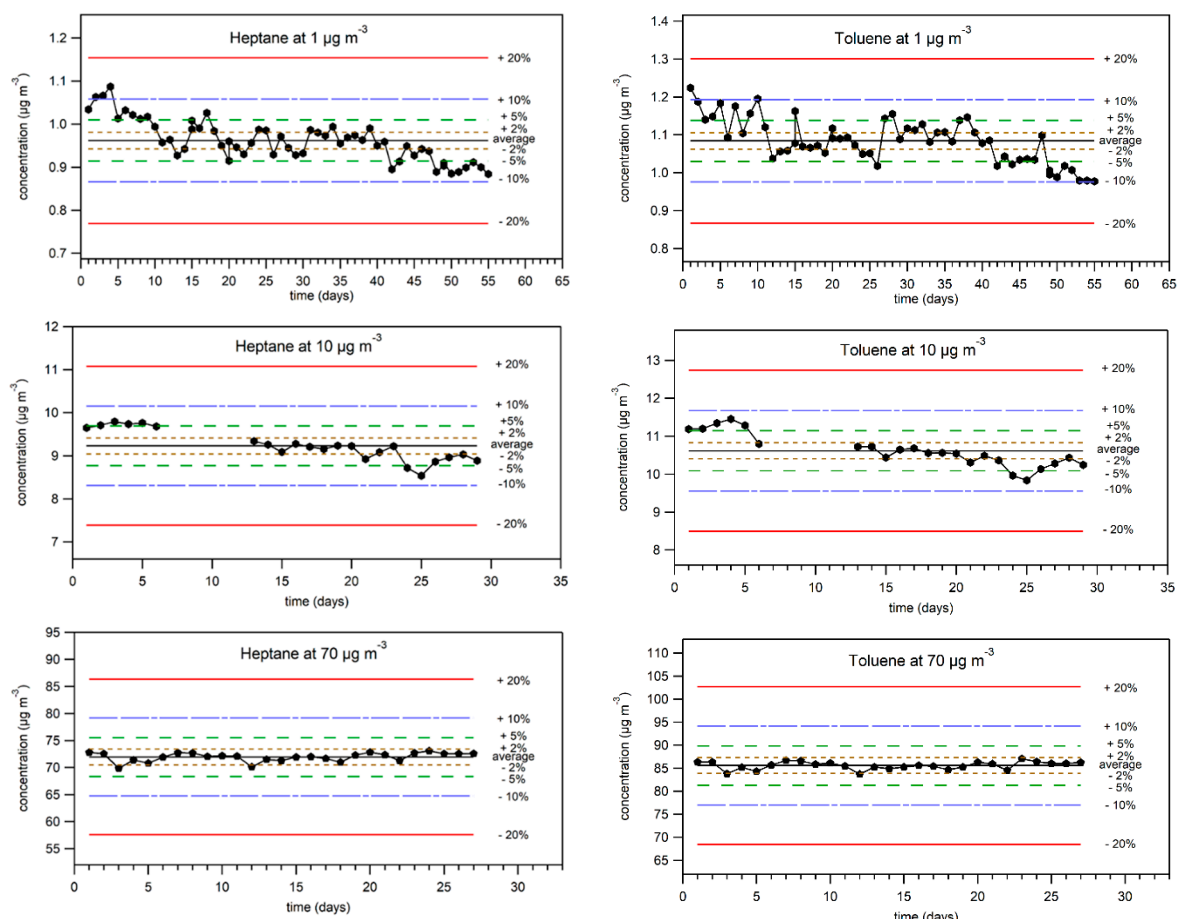

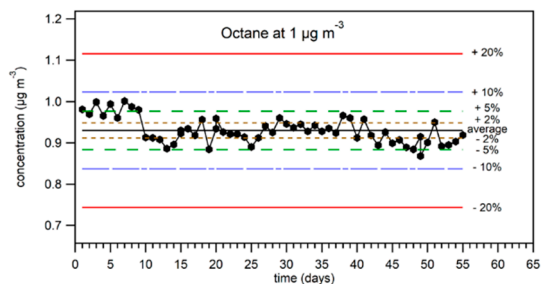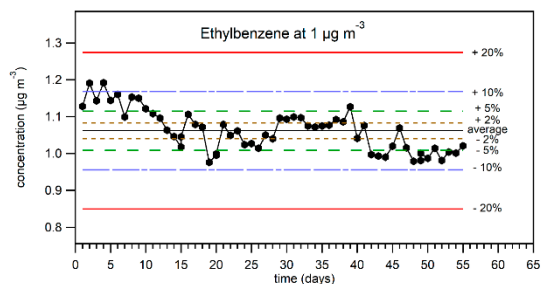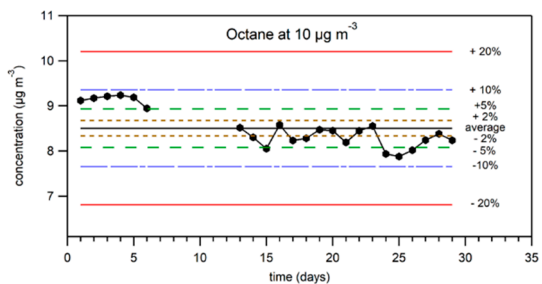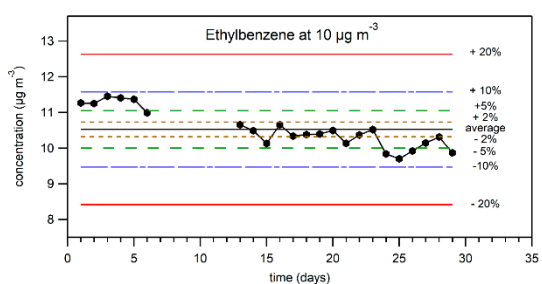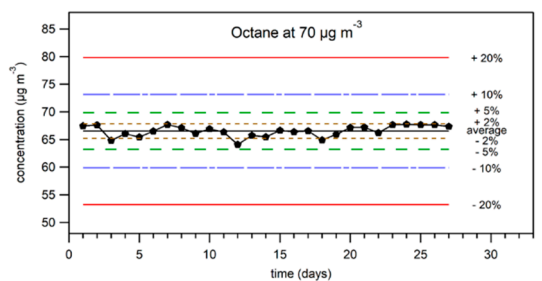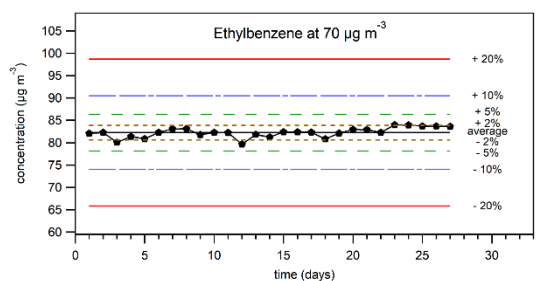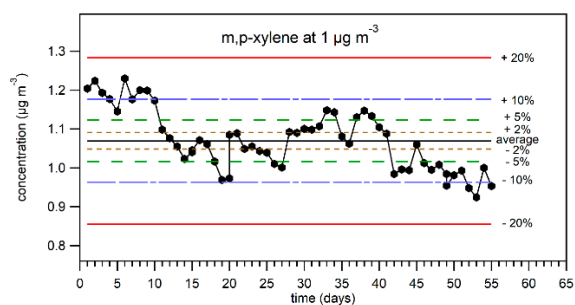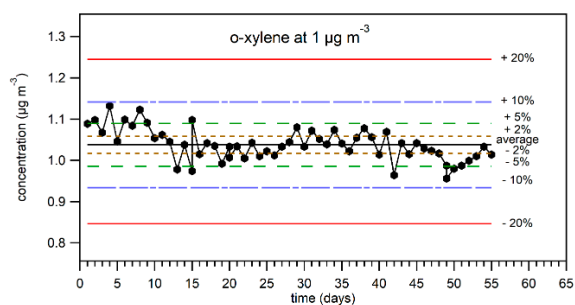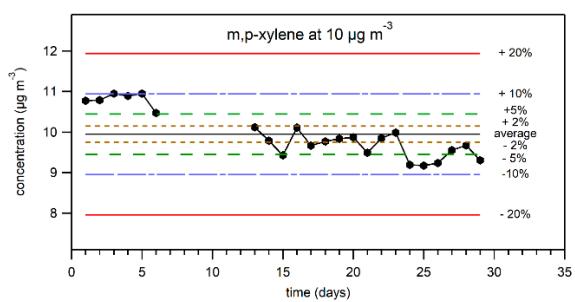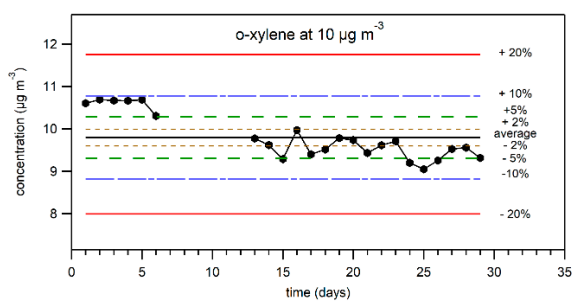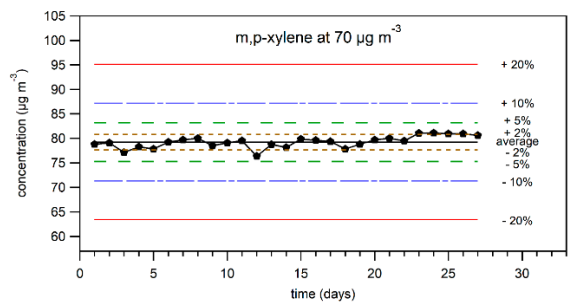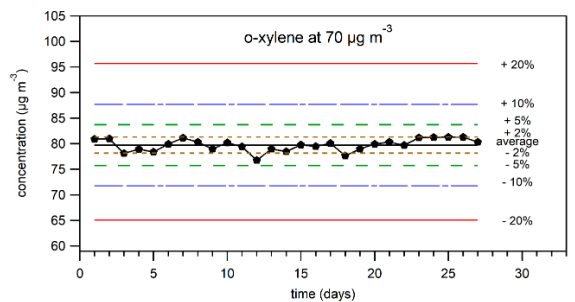

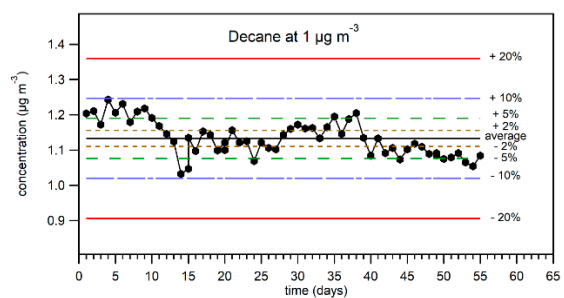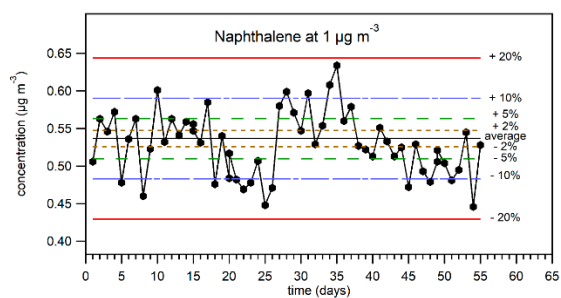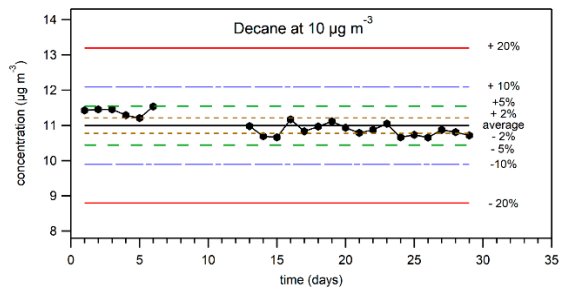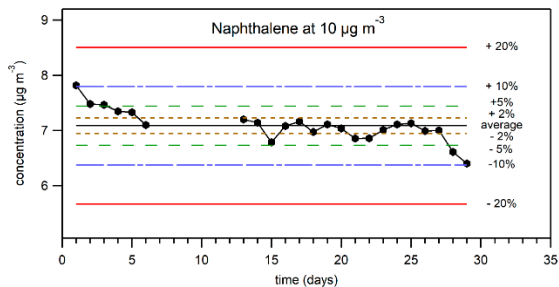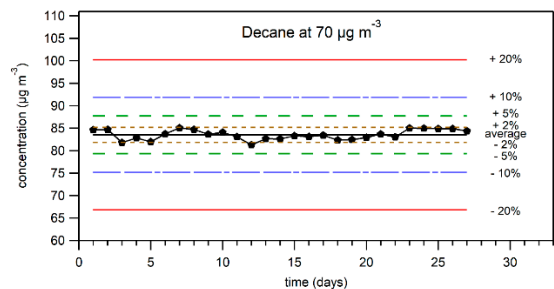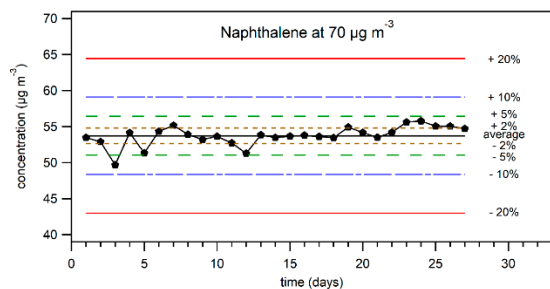

Figure S2: Breakthrough curves for NMHCs at the concentrations of 1 and 70  $\mu\text{g m}^{-3}$  sampled at a flow rate ranging from 2.5 to 4.0  $\text{ml min}^{-1}$ . Green round symbols represent the masses measured in the tubes by GC-MS analysis. Blue triangles represent theoretical doped mass values.

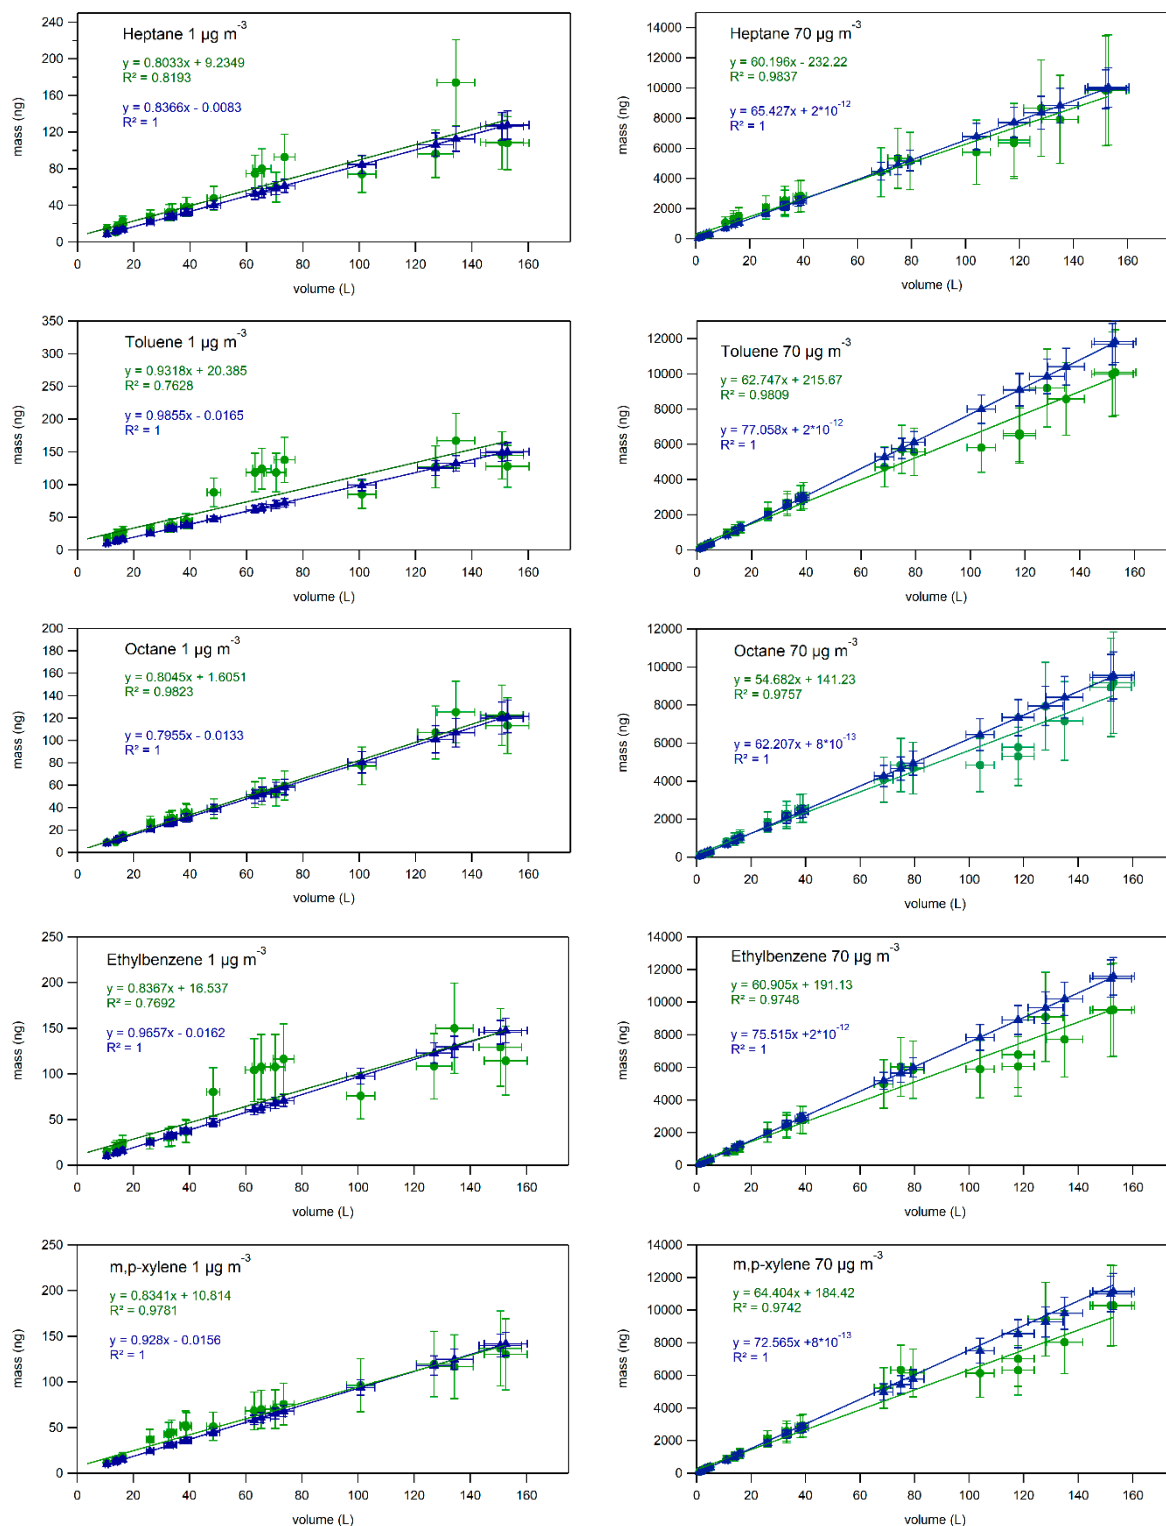

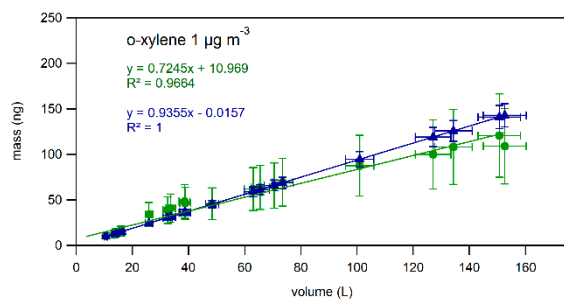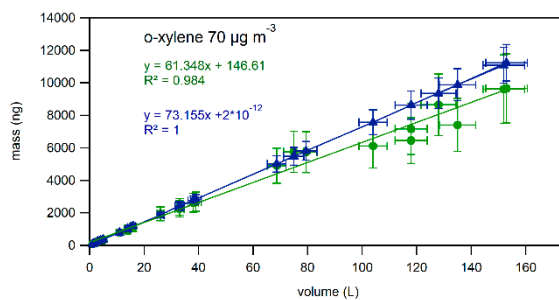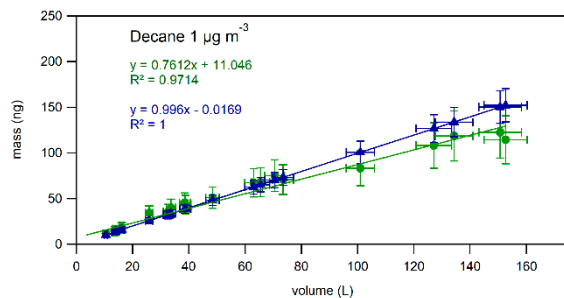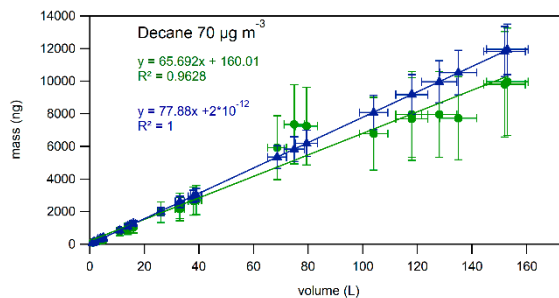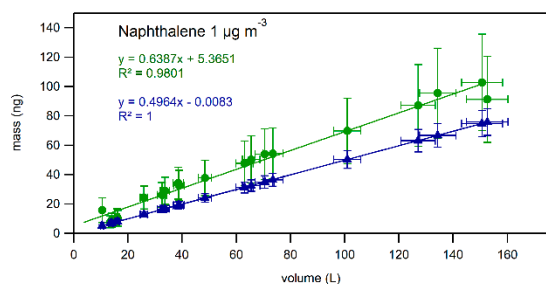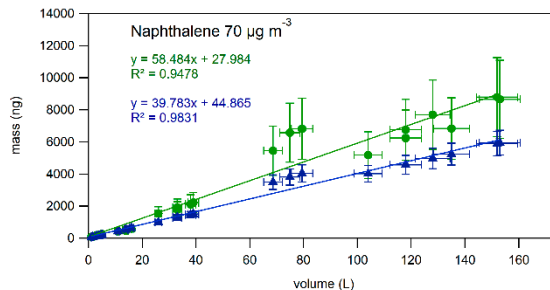

Figure S3: Relationship between measured and theoretical values for heptane, toluene, octane, ethylbenzene, m,p-xylene, p-xylene, decane and naphthalene. In orange (barely visible) are the values from breakthrough experiments done at  $1 \mu\text{g m}^{-3}$ , in blue are the values from breakthrough experiments done at  $10 \mu\text{g m}^{-3}$ , in green are the values from breakthrough experiments done at  $70 \mu\text{g m}^{-3}$ . A black dashed line is a linear fit through the points obtained while doping the tubes with 1, 10 and  $70 \mu\text{g m}^{-3}$ . A dashed red line represents a 1:1 line.

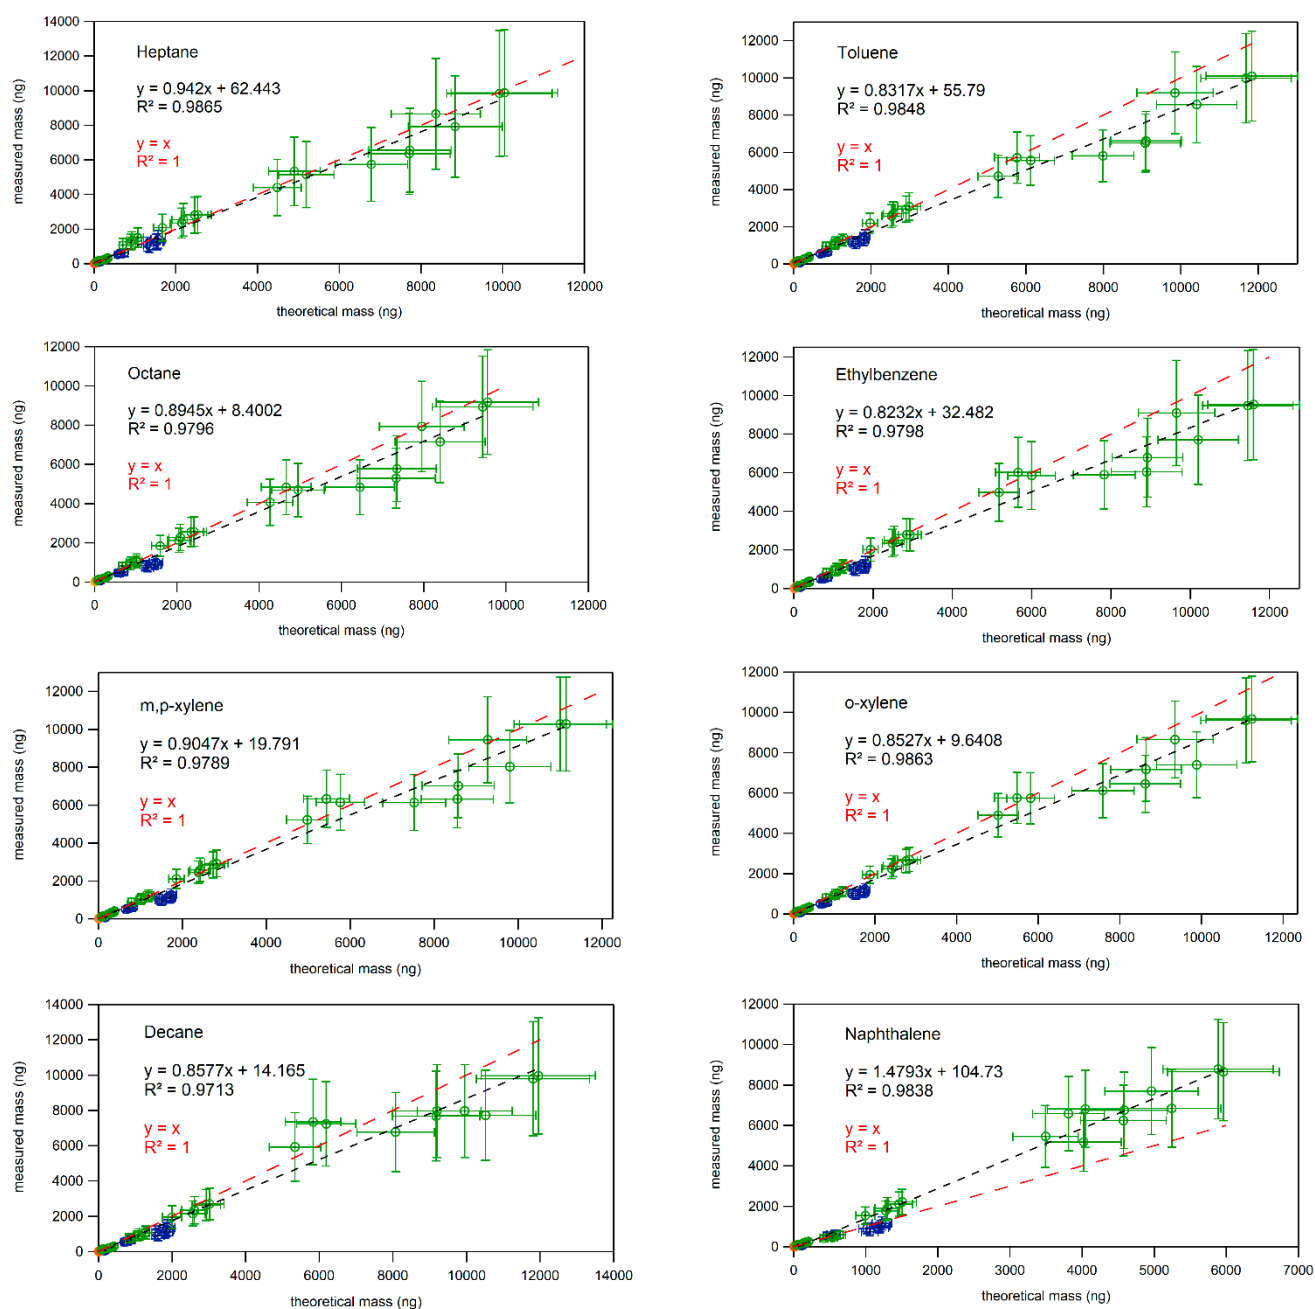

Figure S4: Profiles of heptane, toluene, octane, ethylbenzene, *m,p*-xylene, *p*-xylene, decane and naphthalene concentrations calculated using masses measured by portable GC analyzer. Measurements are taken continuously every hour from 1 of February 2021 to 27 of April 2021.

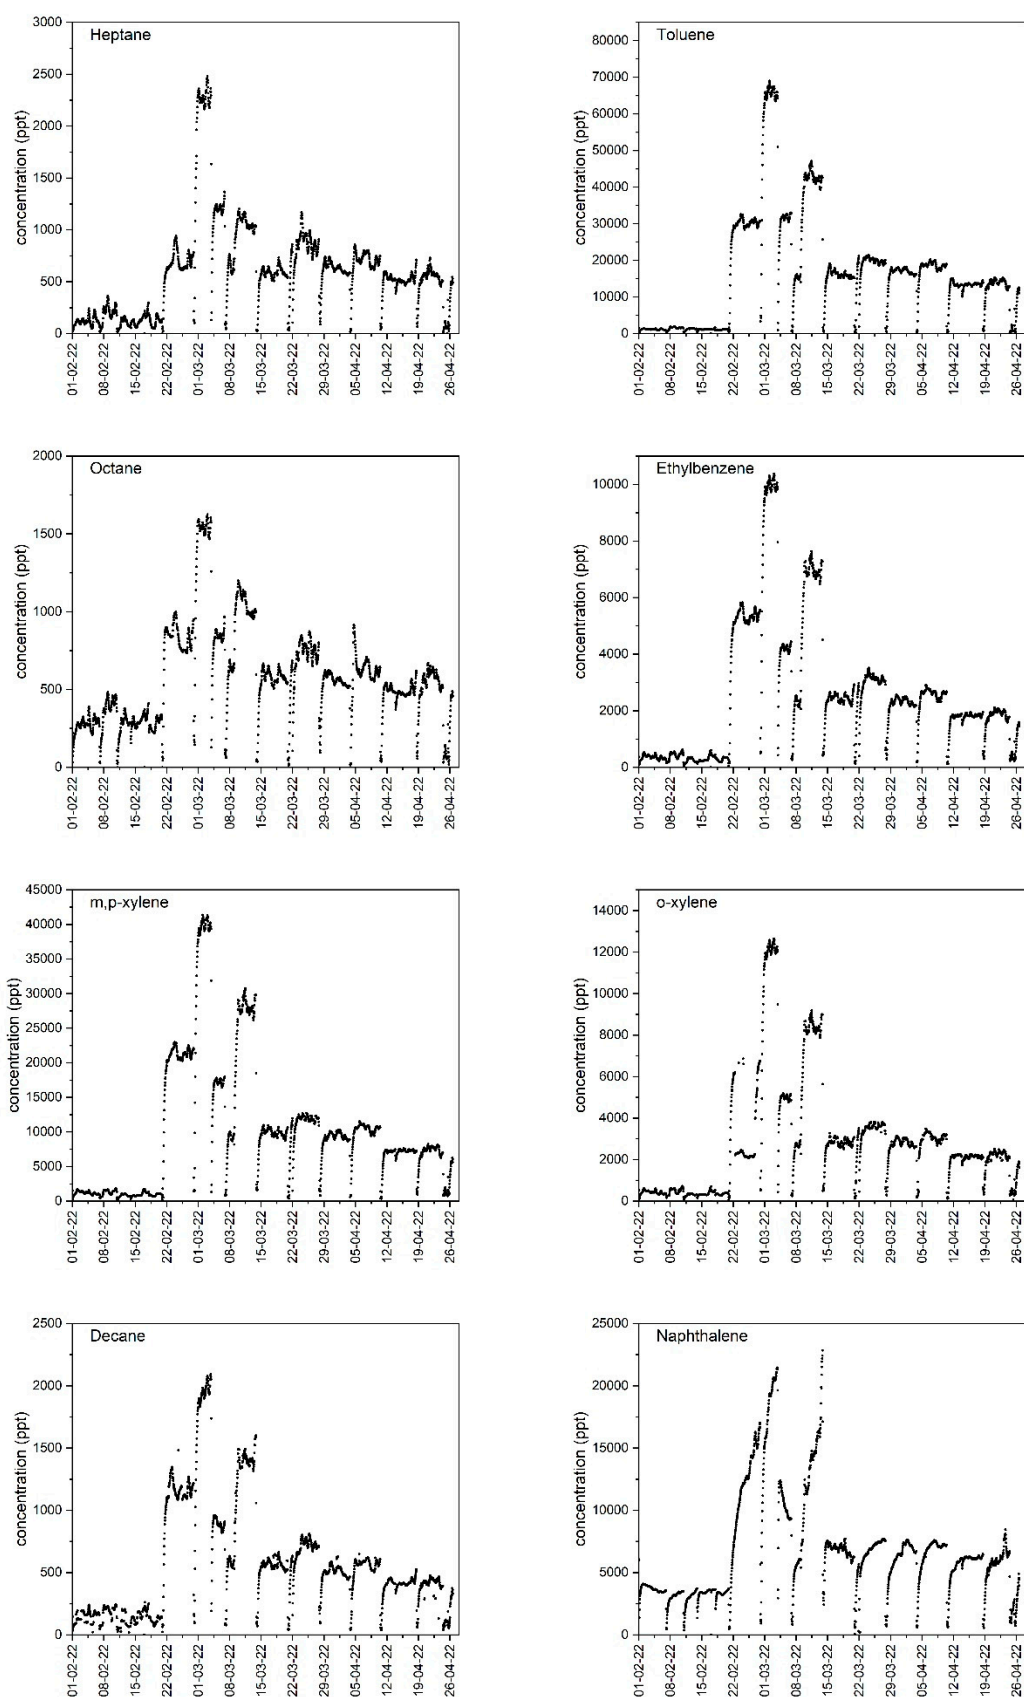

Figure S5: Comparison of average weekly, by-weekly, 4-week and 6-week concentrations for A) heptane, B) octane, C) decane, D) toluene, E) ethylbenzene, F) m,p-xylene, G) o-xylene, H) naphthalene. Red error bars represent the results that are not in accordance with the measurements obtained from portable GC.

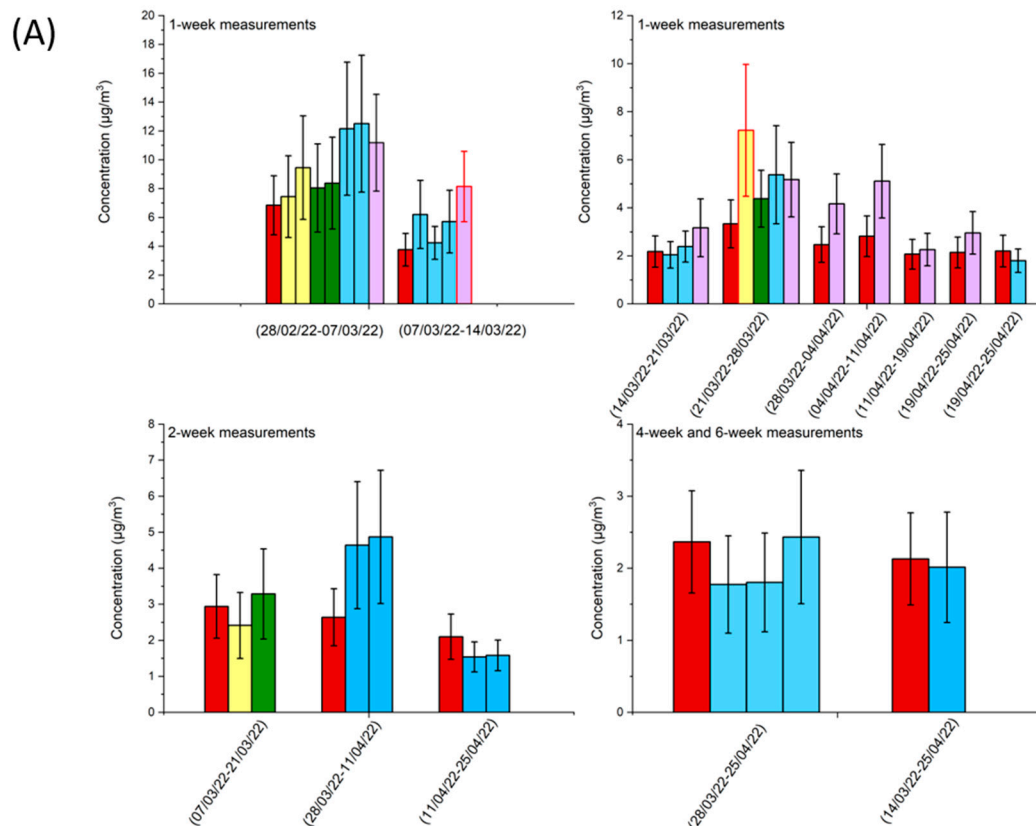

- average concentration calculated from data obtained from portable GC
- concentrations measured using the TB tubes placed outside of the experimental room and connected to it using PTFE tubing
- concentrations measured using the TB tubes placed outside of the experimental room and connected to it using Sulfinert tubing
- concentrations obtained from the TB tubes put directly inside of the testing room
- concentrations measured weekly by RAD samplers placed directly in the testing room

(B)

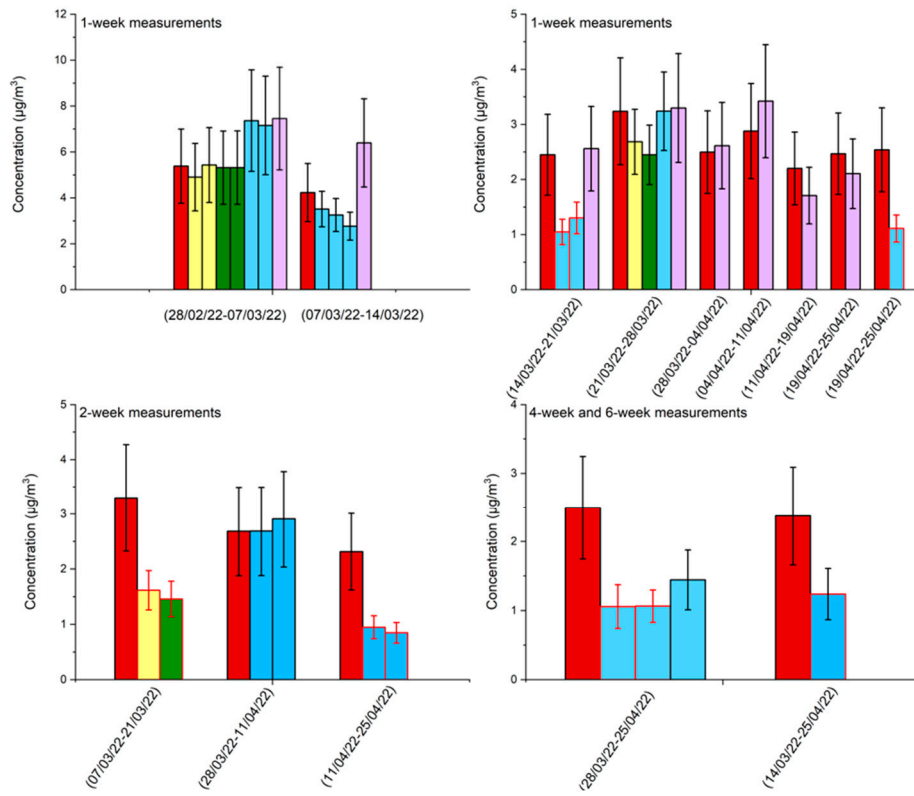

(C)

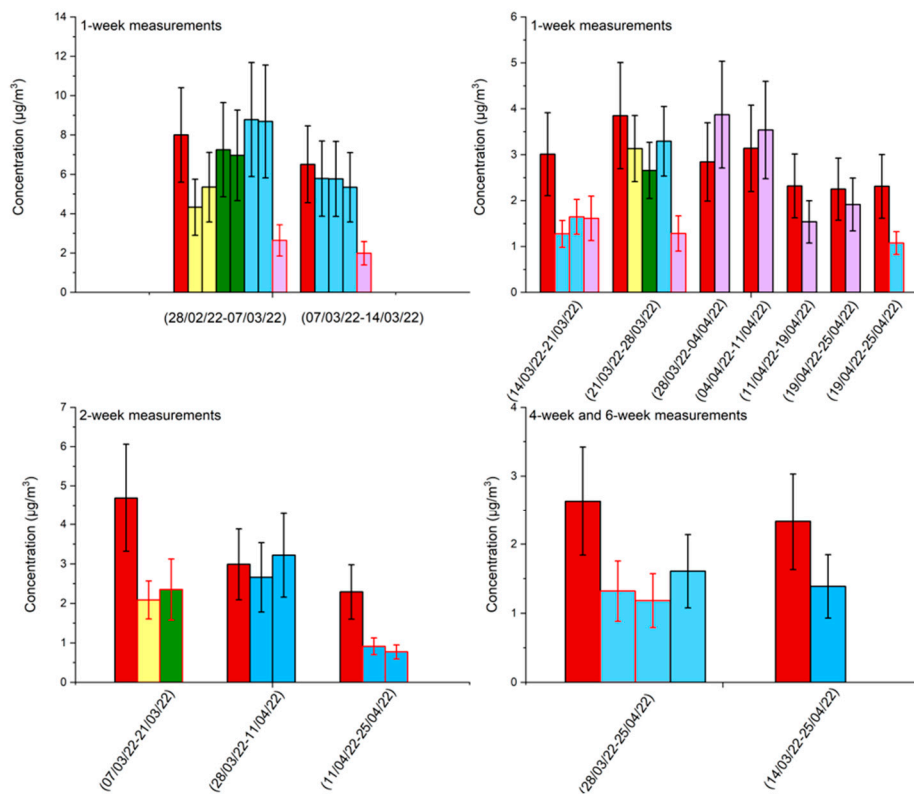

(D)

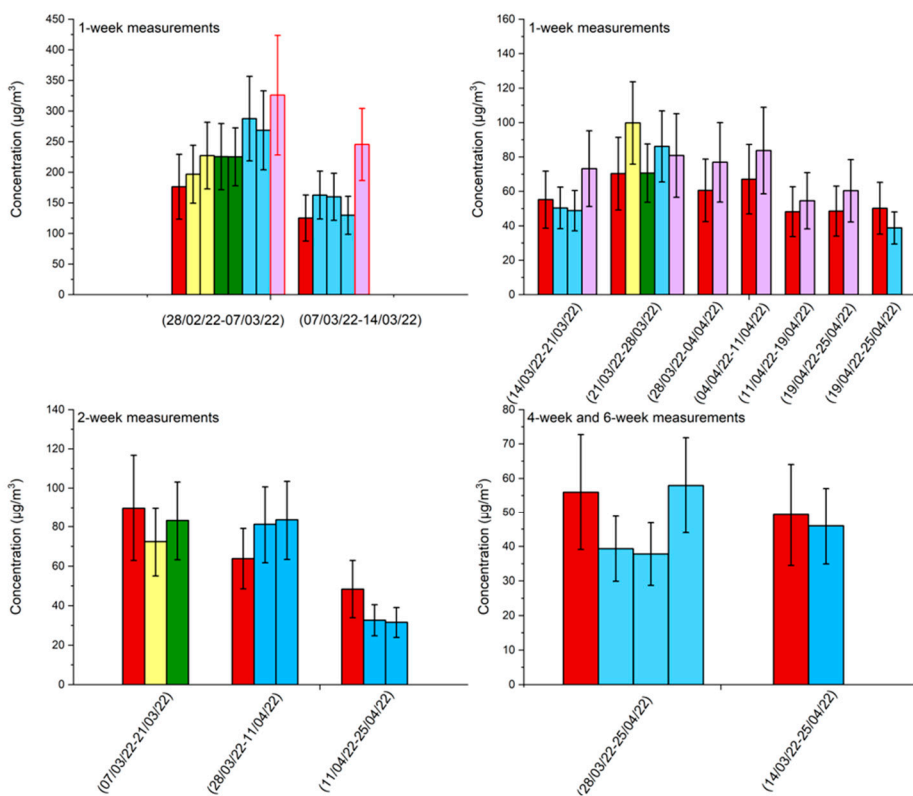

(E)

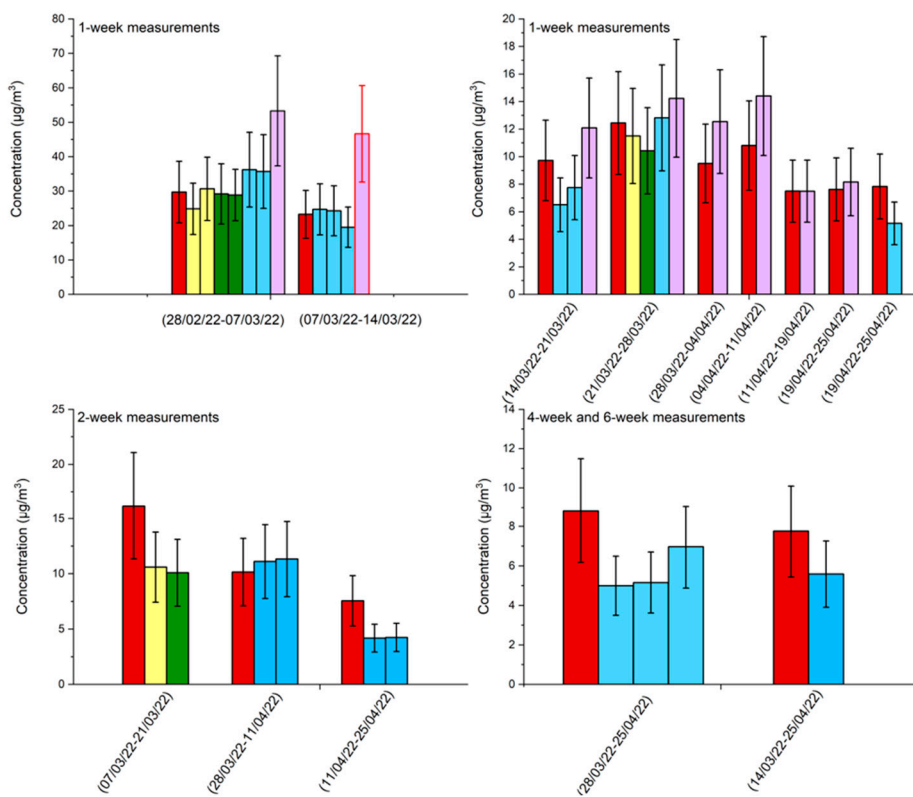

(F)

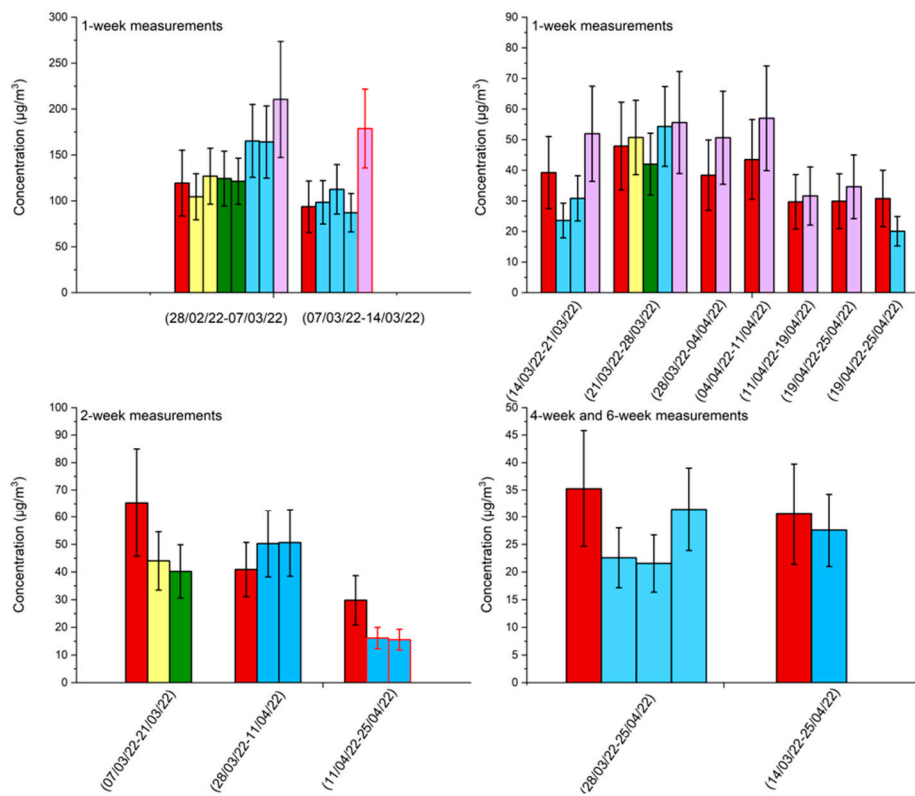

(G)

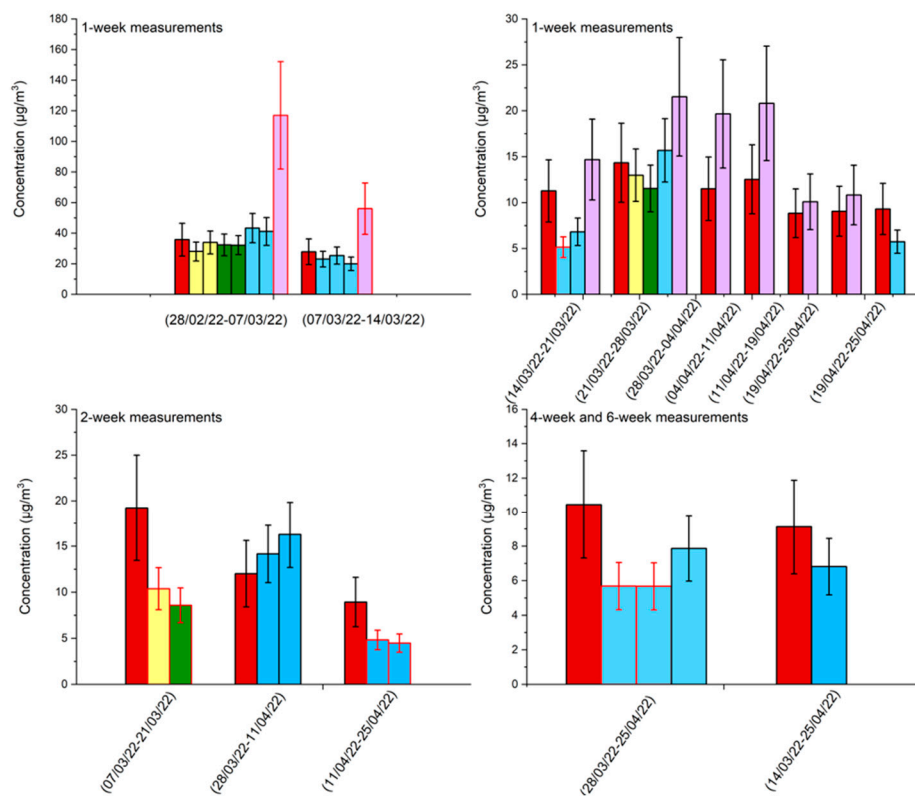

(H)

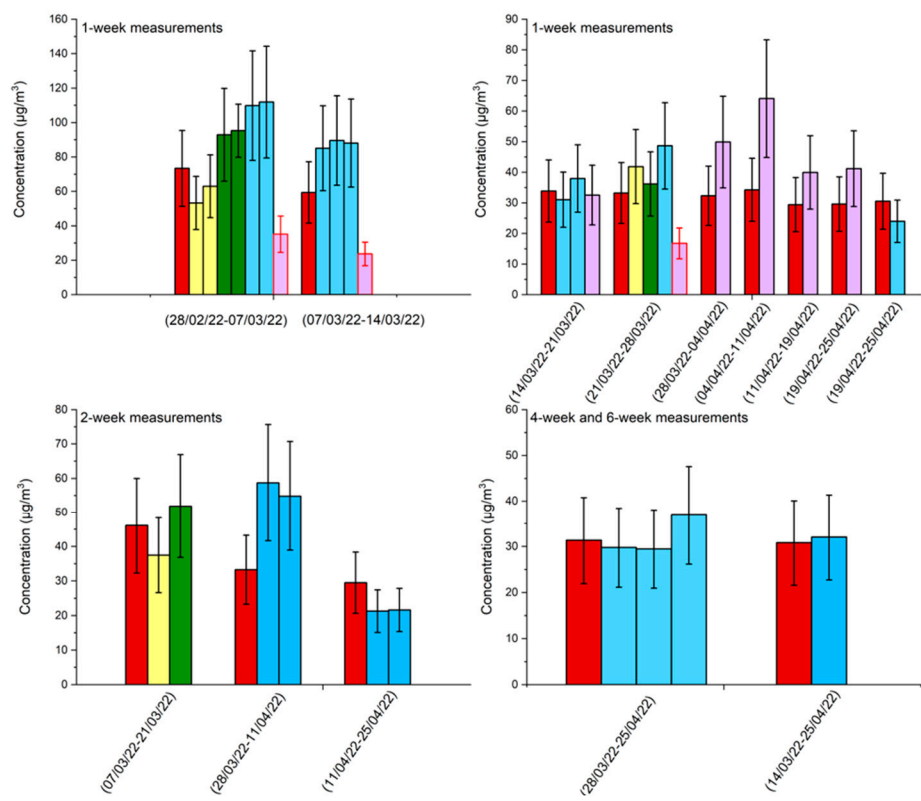

Supplement: s1 [file s1]
